# Supplementary material
Source: publisher figshare collection journal article supplement (https://acs.figshare.com/ndownloader/files/9103558)
Supplement: Supplementary file 1 [file 9103558]

Compound ID	SMILES	IKKalpha Ki (?M)	IKKbeta Ki (?M)
1	O=C1C2=C(NC=C2C#N)N=C(N)N1	Not tested	Not tested
2	N#CC1=CN(C(C)=O)C2=C1C(NC(NC(C)=O)=N2)=O	Not tested	Not tested
3	N#CC1=CNC2=C1C(NC(NC(C(C)(C)C)=O)=N2)=O	Not tested	Not tested
4	ClC1=NC(N)=NC2=C1C(C#N)=CN2	4.0 ± 0.9	>30
5	ClC1=NC(NC(C(C)(C)C)=O)=NC2=C1C(C#N)=CN2	Not tested
6	NC1=NC(N)=NC2=C1C(C#N)=CN2	>30	>30
7	N#CC1=CNC2=C1C(NC)=NC(N)=N2	13.0 ± 0.51	>30
8	N#CC1=CNC2=C1C(NCC3CC3)=NC(N)=N2	16.0 ± 1.1	>30
9	N#CC1=CNC2=C1C(NC3CCCCC3)=NC(N)=N2	1.8 ± 0.31	>30
10	N#CC1=CNC2=C1C(N(C)C3CCCCC3)=NC(N)=N2	>30	>30
11	N#CC1=CNC2=C1C(NC3=CC=CC=C3)=NC(N)=N2	13 ± 1.1	>30
12	N#CC1=CNC2=C1C(NC3=CC=C(C(O)=O)C=C3)=NC(N)=N2	>30	>30
13	N#CC1=CNC2=C1C(NC3=CC=C(S(=O)(N)=O)C=C3)=NC(N)=N2	10 ± 2.9	>30
14	N#CC1=CNC2=C1C(NCC3=CC=CC=C3)=NC(N)=N2	5.3 ± 1.6	19
15	N#CC1=CNC2=C1C(NCCN3CCOCC3)=NC(N)=N2	>30	>30
16	N#CC1=CNC2=C1C(NCCO)=NC(N)=N2	1.6 ± 0.48	>30
17	N#CC1=CNC2=C1C(N3CCCCC3)=NC(N)=N2	5.3 ± 0.9	>30
18	N#CC1=CNC2=C1C(N3CCC(S(=O)(N)=O)CC3)=NC(N)=N2	5.3 ± 0.94	5.9 ± 0.34
19	N#CC1=CNC2=C1C(N3CCOCC3)=NC(N)=N2	>30	20.0 ± 1.3
20	N#CC1=CNC2=C1C(N3CCN(C)CC3)=NC(N)=N2	>30	>30
21	N#CC1=CNC2=C1C(N3CCN(C4=CC=CC=C4)CC3)=NC(N)=N2	>30	>30
22	N#CC1=CNC2=C1C(N3CCN(CCO)CC3)=NC(N)=N2	>30	>30
23	N#CC1=CNC2=C1C(NCCCO)=NC(N)=N2	12.1 ± 6.3	>30
24	N#CC1=CNC2=C1C(N3C[C@H](O)CC3)=NC(N)=N2	>30	>30
25	N#CC1=CNC2=C1C(N3C[C@@H](O)CC3)=NC(N)=N2	6 ± 1.6	>30
26	N#CC1=CNC2=C1C(N3CCC[C@@H]3CO)=NC(N)=N2	2.5 ± 0.14	>30
27	N#CC1=CNC2=C1C(N3CCC[C@H]3CO)=NC(N)=N2	3.1 ± 0.6	>30
28	N#CC1=CNC2=C1C(N[C@H]3CC[C@@H](O)CC3)=NC(N)=N2	2.0 ± 1.5	>30
29	N#CC1=CNC2=C1C(N(C3CCCCC3)CCO)=NC(N)=N2	>30	>30
30	N#CC1=CNC2=C1C(NC3CC[C@@H](O)[C@H]3O)=NC(N)=N2	1.0 ± 0.14	>30
31	N#CC1=CNC2=C1C(NC3C[C@H](O)[C@@H](O)[C@H]3O)=NC(N)=N2	0.8 ± 0.71	3.6 ± 0.87
32	C1CC=CC1	Not tested	Not tested
33	BrC1C=CCC1	Not tested	Not tested
34	C1(N(CC2=CC=CC=C2)CC3=CC=CC=C3)C=CCC1	Not tested	Not tested
35	O[C@@H]1[C@H](O)CCC1N(CC2=CC=CC=C2)CC3=CC=CC=C3	Not tested	Not tested
36	[C@@H]1(OCC2=CC=CC=C2)CCC(N(CC3=CC=CC=C3)CC4=CC=CC=C4)[C@@H]1OCC5=CC=CC=C5	Not tested	Not tested
37	NC1[C@H](OCC2=CC=CC=C2)[C@H](OCC3=CC=CC=C3)CC1	Not tested	Not tested
38	O[C@H]1C[C@@H](OC(C)=O)C=C1	Not tested	Not tested
39	O[C@H]1C[C@@H](N(C(C(C)(C)C)=O)C(C(C)(C)C)=O)C=C1	Not tested	Not tested
40	O[C@H]1C[C@@H](N(C(C(C)(C)C)=O)C(C(C)(C)C)=O)[C@H](O)[C@@H]1O	Not tested	Not tested
41	O=C(C(C)(C)C)N(C(C(C)(C)C)=O)[C@H]1[C@H](OCC2=CC=CC=C2)[C@H](OCC3=CC=CC=C3)[C@@H](OCC4=CC=CC=C4)C1	Not tested	Not tested
42	N[C@H]1[C@H](OCC2=CC=CC=C2)[C@H](OCC3=CC=CC=C3)[C@@H](OCC4=CC=CC=C4)C1	Not tested	Not tested
43	N#CC1=CNC2=C1C(C3=CC=CC=C3)=NC(N)=N2	1.7 ± 0.95	>30
44	N#CC1=CNC2=C1C(C3=CC=C(O)C=C3)=NC(N)=N2	1.6 ± 0.35	20 ± 1.2
45	N#CC1=CNC2=C1C(C3=CC=C(F)C=C3)=NC(N)=N2	10 ± 1.0	>30
46	N#CC1=CNC2=C1C(C3=CC=C(C(N)=O)C=C3)=NC(N)=N2	16 ± 1.1	>30
47	N#CC1=CNC2=C1C(C3=CC=C(CO)C=C3)=NC(N)=N2	0.65 ± 0.06	2.3 ± 1.1
48	N#CC1=CNC2=C1C(C3=CC=C(S(=O)(N)=O)C=C3)=NC(N)=N2	0.08 ± 0.07	1.0 ± 0.28
49	N#CC1=CNC2=C1C(C3=CC=C(S(=O)(C)=O)C=C3)=NC(N)=N2	2.4 ± 0.24	0.3 ± 0.6
50	N#CC1=CNC2=C1C(C3=CC=C(S(=O)(NC)=O)C=C3)=NC(N)=N2	1.7 ± 1.2	0.4 ± 0.48
51	N#CC1=CNC2=C1C(C3=CC=C(S(=O)(NC4=CC=C(C)C=C4)=O)C=C3)=NC(N)=N2	16 ± 5.8	1.4 ± 0.9
52	N#CC1=CNC2=C1C(C3=CC=C(NS(=O)(C)=O)C=C3)=NC(N)=N2	1.4 ± 0.2	0.1 ± 0.6
53	N#CC1=CNC2=C1C(C3=CC=CC(O)=C3)=NC(N)=N2	2.4 ± 0.2	3.8 ± 1.7
54	N#CC1=CNC2=C1C(C3=CC=CC(F)=C3)=NC(N)=N2	7.7 ± 1.3	>30
55	N#CC1=CNC2=C1C(C3=CC=CC(C(N)=O)=C3)=NC(N)=N2	>30	>30
56	N#CC1=CNC2=C1C(C3=CC=CC(CO)=C3)=NC(N)=N2	9.8 ± 0.54	4.0 ± 1.7
57	N#CC1=CNC2=C1C(C3=CC=CC(S(=O)(N)=O)=C3)=NC(N)=N2	5.3 ± 0.95	5.9 ± 3.4
58	N#CC1=CNC2=C1C(C3=CC=CC=C3O)=NC(N)=N2	15 ± 1.11	>30
59	N#CC1=CNC2=C1C(C3=CC=CC=C3F)=NC(N)=N2	2.0 ± 0.5	>30
60	N#CC1=CNC2=C1C(C3=CC=CC=C3C(N)=O)=NC(N)=N2	>30	>30
61	N#CC1=CNC2=C1C(C3=CC=CC=C3CO)=NC(N)=N2	>30	>30
62	N#CC1=CNC2=C1C(C3=CC=CC=C3S(=O)(N)=O)=NC(N)=N2	>30	>30
63	ClC1=NC(N)=NC2=C1C=CN2	>30	>30
64	NC1=NC(NC=C2)=C2C(C3=CC=C(S(=O)(N)=O)C=C3)=N1	2.9 ± 0.71	0.61 ± 0.23
65	O=S(C(C=C1)=CC=C1C2=NC=NC3=C2C=CN3)(N)=O	1.5 ± 0.36	2.5 ± 1.1
66	O=S(C(C=C1)=CC=C1C2=NC=NC3=C2C(C#N)=CN3)(N)=O	2.1 ± 0.5	>30
67	NC1=NC(NC=C2)=C2C(N3CCCCC3)=N1	>30	>30
68	NC1=NC(NC=C2)=C2C(NC3CCCCC3)=N1	>30	>30
69	NC1=NC(NC=C2)=C2C(N[C@@H]3CC[C@@H](O)CC3)=N1	>30	>30
70	NC1=NC(NC=C2C(F)(F)F)=C2C(NC3CCCCC3)=N1	>30	>30
71	NC1=NC(NC=C2C(N)=O)=C2C(N[C@@H]3CC[C@@H](O)CC3)=N1	>30	>30
